# Supplementary material for: Cellular Levels of HIV Unspliced RNA from Patients on Combination Antiretroviral Therapy with Undetectable Plasma Viremia Predict the Therapy Outcome
Source: PubMed Central journal article supplement (PMC2795168; doi:10.1371/journal.pone.0008490), 2009-12-31
Supplement: pone.0008490.s001.pdf [file pone.0008490.s001.pdf]

|        | GAG1 (sense I, II)       | GAG2 (antisense II)    | GAG3 (probe)               | SK431 (antisense I)          | MRQE  |
|--------|--------------------------|------------------------|----------------------------|------------------------------|-------|
| REF    | TCAGCCCAGAAGTAATACCCATGT | CACTGTGTTTAGCATGGTGTTT | ATTATCAGAAGGAGCCACCCACAAGA | TGCTATGTCAGTTCGCCCTTGGTTCTCT |       |
| M10091 | .....                    | .....                  | .....                      | .....A.....C.....            | 0.00  |
| M10977 | .....                    | .....                  | .....                      | .....C.....                  | 0.02  |
| M12735 | .....                    | .....                  | .....                      | .....C.....C.....            | -0.03 |
| M12814 | .....                    | .....R.....            | .....                      | .....C.....                  | -0.01 |
| M12852 | .....R.....              | .....A.C.....A.....    | .....                      | .....C.....G.....            | -0.53 |
| M12860 | .....                    | .....                  | .....                      | .....C.....                  | 0.00  |
| M12865 | .....G.....              | .....R.....            | .....                      | .....C.....                  | -0.10 |
| M14693 | .....                    | .....                  | .....                      | .....C.....                  | -0.02 |
| M14741 | .....Y.....              | .....                  | .....                      | .....C.....                  | -0.03 |
| M14758 | .....                    | .....                  | .....                      | .....C.....                  | -0.12 |
| M14769 | .....Y.....R.....        | .....Y.....            | .....R.....R.....          | .....C.....                  | -0.18 |
| M14785 | .....Y.....              | .....                  | .....                      | .....A.....C.....            | -0.15 |
| M17561 | .....                    | .....                  | .....                      | .....A.....C.....            | -0.07 |
| M14453 | .....T..T.....           | .....                  | .....                      | .....C.....                  | 0.00  |
| M12794 | .....R.....              | .....C.....            | .....                      | .....C.....                  | -0.23 |
| M14602 | .....AT.....G.....       | .....                  | .....                      | .....C.....                  | -0.21 |
| M14705 | .....                    | .....A.....            | .....C.....                | .....C.....G.....            | -0.05 |
| M14732 | .....Y.....              | .....A.....A.....      | .....                      | .....C.....                  | -0.04 |
| M11835 | .....                    | .....                  | .....                      | .....C.....                  | -0.07 |
| M12862 | .....T.....              | .....                  | .....                      | .....C.....                  | 0.03  |
| M14464 | .....                    | .....                  | .....                      | .....C.....                  | 0.02  |
| M14639 | .....Y.....              | .....                  | .....                      | .....G.....C.....            | -0.02 |
| M14659 | .....                    | .....                  | .....                      | .....A..GC.....              | 0.04  |
| M14760 | .....                    | .....A.....            | .....G.....                | .....A..C.....               | -0.13 |
| M14858 | .....R.....              | .....R.....            | .....                      | .....C.....                  | -0.06 |
| M14780 | .....                    | .....                  | .....                      | .....C.....                  | 0.11  |

**Figure S1. Sequences of primer and probe target regions of seminested real-time PCR assays for usRNA and prDNA detection.** Patient-derived sequences are compared with sequences of corresponding primers or probe (designated by "REF"). Patient numbers are given in the left column, and corresponding MRQE (mismatch-related quantification errors) are shown on the right. All primers and probe are in 5'-3' orientation.
