# Supplementary material for: Cellular Levels of HIV Unspliced RNA from Patients on Combination Antiretroviral Therapy with Undetectable Plasma Viremia Predict the Therapy Outcome
Source: PubMed Central journal article supplement (PMC2795168; doi:10.1371/journal.pone.0008490), 2009-12-31
Supplement: pone.0008490.s002.pdf [file pone.0008490.s002.pdf]

**Table S1.** HIV-1 load in PBMC and plasma and CD4<sup>+</sup> counts

| Patient group  | Patient ID | Follow-up period, months | Study month <sup>a</sup> | Plasma RNA, log <sub>10</sub> copies/ml | PrDNA, log <sub>10</sub> copies/10 <sup>6</sup> PBMC | UsRNA, log <sub>10</sub> copies/μg total RNA | MsRNA, log <sub>10</sub> copies/μg total RNA | CD4 <sup>+</sup> T cell count, cells / mm <sup>3</sup> blood |
|----------------|------------|--------------------------|--------------------------|-----------------------------------------|------------------------------------------------------|----------------------------------------------|----------------------------------------------|--------------------------------------------------------------|
| F <sup>b</sup> | M10091     | 30.85                    | 0                        | 2.53                                    | n/a <sup>c</sup>                                     | n/a                                          | n/a                                          | 140                                                          |
|                |            |                          | 3.57                     | <1.70 <sup>d</sup>                      | 2.68                                                 | 4.24                                         | n/d <sup>e</sup>                             | 270                                                          |
|                |            |                          | 15.48                    | <1.70                                   | 2.66                                                 | 3.85                                         | n/d                                          | 320                                                          |
|                |            |                          | 27.87                    | <1.70                                   | 1.77                                                 | 2.98                                         | n/d                                          | 400                                                          |
| F              | M10977     | 25.97                    | 0                        | 5.34                                    | n/a                                                  | n/a                                          | n/a                                          | 100                                                          |
|                |            |                          | 24.79                    | <1.70                                   | 3.02                                                 | 3.82                                         | n/d                                          | 250                                                          |
| F              | M11835     | 18.33                    | 0                        | 3.60                                    | 2.91                                                 | 3.82                                         | n/d                                          | 280                                                          |
|                |            |                          | 1.84                     | <1.70                                   | 3.11                                                 | 3.45                                         | n/d                                          | 580                                                          |
|                |            |                          | 4.72                     | <1.70                                   | 3.00                                                 | 3.25                                         | n/d                                          | 470                                                          |
|                |            |                          | 10.56                    | <1.70                                   | 3.66                                                 | 3.26                                         | n/d                                          | 680                                                          |
| F              | M12735     | 41.84                    | 0                        | 4.00                                    | 4.20                                                 | 4.01                                         | 2.63                                         | 280                                                          |
|                |            |                          | 29.70                    | <1.70                                   | 2.79                                                 | 3.40                                         | n/d                                          | 730                                                          |
|                |            |                          | 39.11                    | <1.70                                   | 3.03                                                 | 4.17                                         | n/d                                          | 470                                                          |
| F              | M12794     | 20.69                    | 0                        | 4.97                                    | 4.60                                                 | 4.71                                         | 3.08                                         | 140                                                          |
|                |            |                          | 6.89                     | <1.70                                   | 4.36                                                 | 4.56                                         | 2.29                                         | 360                                                          |
| F              | M12814     | 47.64                    | 0                        | 3.88                                    | 3.02                                                 | 4.62                                         | 2.85                                         | 150                                                          |
|                |            |                          | 44.46                    | <1.70                                   | 2.26                                                 | 3.02                                         | n/d                                          | 530                                                          |
| F              | M12860     | 28.85                    | 0                        | 4.59                                    | 3.64                                                 | 5.53                                         | 3.12                                         | 120                                                          |
|                |            |                          | 25.90                    | <1.70                                   | 2.48                                                 | 4.29                                         | 2.84                                         | 230                                                          |
| F              | M12865     | 14.69                    | 0                        | 5.61                                    | 3.45                                                 | 5.16                                         | 3.20                                         | 170                                                          |
|                |            |                          | 11.93                    | <1.70                                   | 3.43                                                 | 3.67                                         | n/d                                          | 360                                                          |
| F              | M14453     | 18.26                    | 0                        | 3.41                                    | 3.91                                                 | 4.40                                         | 2.69                                         | 300                                                          |
|                |            |                          | 0.92                     | <1.70                                   | 3.14                                                 | 3.48                                         | n/d                                          | 280                                                          |
| F              | M14464     | 30.92                    | 0                        | 4.35                                    | 3.99                                                 | 4.53                                         | 3.22                                         | 270                                                          |
|                |            |                          | 14.16                    | <1.70                                   | 3.43                                                 | 3.64                                         | n/d                                          | 550                                                          |
|                |            |                          | 27.97                    | <1.70                                   | 3.50                                                 | 3.10                                         | n/d                                          | 390                                                          |
| F              | M14639     | 37.41                    | 0                        | 4.91                                    | 4.13                                                 | 4.45                                         | 2.81                                         | 250                                                          |
|                |            |                          | 17.97                    | <1.70                                   | 3.69                                                 | 3.16                                         | n/d                                          | 420                                                          |
|                |            |                          | 34.43                    | <1.70                                   | 3.55                                                 | 3.53                                         | n/d                                          | 640                                                          |
| F              | M14659     | 12.95                    | 0                        | 4.76                                    | 4.41                                                 | 5.01                                         | 3.51                                         | 280                                                          |
|                |            |                          | 5.61                     | <1.70                                   | 3.93                                                 | 3.44                                         | n/d                                          | 500                                                          |

|                |        |       |       |       |                    |       |      |      |
|----------------|--------|-------|-------|-------|--------------------|-------|------|------|
|                |        |       | 11.11 | <1.70 | 3.64               | 3.16  | 1.96 | 510  |
| F              | M14741 | 7.41  | 0     | 4.84  | 4.39               | 5.18  | 3.89 | 480  |
|                |        |       | 6.03  | <1.70 | 3.59               | 3.44  | n/d  | 380  |
| F              | M14858 | 15.31 | 0     | 4.36  | 3.68               | 4.13  | 2.89 | 270  |
|                |        |       | 8.89  | <1.70 | 3.67               | 3.72  | 2.49 | 480  |
| F              | M17561 | 41.51 | 0     | 5.15  | 3.81               | 4.08  | n/d  | 60   |
|                |        |       | 29.15 | <1.70 | 3.00               | 3.84  | 1.82 | 750  |
|                |        |       | 38.33 | <1.70 | 3.04               | 4.02  | n/d  | 850  |
| S <sup>f</sup> | M12852 | 72.52 | 0     | 4.48  | 2.31               | 3.91  | 3.30 | 350  |
|                |        |       | 5.51  | <1.70 | <1.82 <sup>g</sup> | 3.01  | n/d  | 390  |
|                |        |       | 43.80 | <1.70 | <1.63              | <2.38 | n/d  | 490  |
|                |        |       | 72.52 | <1.70 | <1.91              | <2.51 | n/d  | 750  |
| S              | M12862 | 25.74 | 0     | 4.71  | 4.41               | 4.84  | n/d  | 160  |
|                |        |       | 3.44  | <1.70 | 3.99               | 3.42  | n/d  | 310  |
|                |        |       | 13.57 | <1.70 | 3.51               | 3.30  | n/d  | 470  |
|                |        |       | 25.74 | <1.70 | 3.22               | 3.41  | n/d  | 550  |
| S              | M14602 | 29.74 | 0     | 4.53  | 4.00               | 4.44  | n/d  | 380  |
|                |        |       | 3.15  | <1.70 | 3.41               | <2.21 | n/d  | 490  |
|                |        |       | 18.26 | <1.70 | 3.23               | 3.19  | n/d  | 1040 |
|                |        |       | 29.74 | <1.70 | 3.47               | 3.07  | n/d  | 620  |
| S              | M14693 | 54.98 | 0     | 3.90  | 3.46               | 4.98  | 3.74 | 460  |
|                |        |       | 14.23 | <1.70 | 2.79               | 3.43  | n/d  | 630  |
|                |        |       | 54.98 | <1.70 | 2.91               | 2.74  | 1.98 | 820  |
| S              | M14705 | 24.95 | 0     | 4.11  | 4.02               | 4.45  | 2.53 | 640  |
|                |        |       | 3.61  | <1.70 | 3.04               | 2.72  | n/d  | 820  |
|                |        |       | 13.74 | <1.70 | 2.37               | 2.84  | n/d  | 810  |
|                |        |       | 24.95 | <1.70 | 2.24               | 2.78  | n/d  | 1190 |
| S              | M14732 | 15.84 | 0     | 4.48  | 4.22               | 4.23  | 3.06 | 480  |
|                |        |       | 1.84  | <1.70 | 3.39               | 2.91  | n/d  | 610  |
|                |        |       | 15.84 | <1.70 | 3.72               | 3.04  | n/d  | 730  |
| S              | M14758 | 47.70 | 0     | 5.67  | 3.64               | 5.99  | 3.01 | 370  |
|                |        |       | 47.70 | <1.70 | 2.81               | 3.68  | n/d  | 170  |
| S              | M14760 | 23.28 | 0     | 4.30  | 3.75               | 4.14  | 2.84 | 210  |
|                |        |       | 11.80 | <1.70 | 3.27               | 3.51  | n/d  | 420  |
|                |        |       | 23.28 | <1.70 | 3.41               | 3.45  | 2.15 | 420  |
| S              | M14769 | 57.38 | 0     | 3.85  | 3.28               | 4.84  | 2.67 | 190  |

|   |        |       |       |       |      |      |      |      |
|---|--------|-------|-------|-------|------|------|------|------|
|   |        |       | 16.82 | <1.70 | 2.63 | 3.61 | n/d  | 320  |
|   |        |       | 57.38 | <1.70 | 2.38 | 4.20 | 2.39 | 700  |
| S | M14780 | 26.26 | 0     | 4.50  | 4.13 | 4.50 | 2.92 | 250  |
|   |        |       | 5.41  | <1.70 | 3.76 | 3.45 | n/d  | 350  |
|   |        |       | 26.26 | <1.70 | 3.61 | 2.71 | n/d  | 380  |
| S | M14785 | 59.02 | 0     | 4.30  | 3.04 | 5.29 | 4.09 | 650  |
|   |        |       | 48.46 | <1.70 | 2.52 | 2.84 | n/d  | 1750 |
|   |        |       | 59.02 | <1.70 | 1.93 | 3.26 | n/d  | 940  |

---

<sup>a</sup> Baseline (time of cART initiation) was taken as zero time point for every patient.

<sup>b</sup> F, future failures on cART.

<sup>c</sup> n/a, not applicable. No baseline PBMC samples were available for patients M10091 and M10977.

<sup>d</sup> 1,70 log<sub>10</sub> copies/ml plasma corresponds to 50 copies/ml plasma (limit of detection of modern commercial assays).

<sup>e</sup> n/d, not detected.

<sup>f</sup> S, successfully treated patients.

<sup>g</sup> For the four PBMC samples in which prDNA and/or usRNA were undetectable, detection limits of the corresponding assays are shown.
